# Supplementary material for: A Review of the Pharmacological Potential of Spatholobus suberectus Dunn on Cancer
Source: MDPI journal article supplement (doi:10.3390/cells11182885), 2022-09-15
Supplement: s1 [file s1]

## Supplementary Materials

### A Review of the Pharmacological Potential of *Spatholobus suberectus* Dunn on Cancer

Feng Zhang<sup>a,b#</sup>, Kumar Ganesan<sup>a#</sup>, Qingqing Liu<sup>a#</sup>, Jianping Chen<sup>a,b\*</sup>

<sup>a</sup>School of Chinese Medicine, LKS Faculty of Medicine, The University of Hong Kong, Hong Kong

<sup>b</sup>Shenzhen Institute of Research and Innovation, The University of Hong Kong, Shenzhen, China

**Table S1.** *In vitro* pharmacological properties of *Spatholobi Caulis* Dunn

| Active constituents of SSD              | Dose                   | Positive control | Mechanism of action                  | Activity               | References |
|-----------------------------------------|------------------------|------------------|--------------------------------------|------------------------|------------|
| Methanol extracts                       | 200 µg/mL              | -                | HIV-1 PR inhibition                  | Antimicrobial activity | [1]        |
| Aqueous extracts                        | 14.8-60.8 µg/mL        | -                | -                                    |                        | [2]        |
|                                         | 5, 10 µg/mL            | -                | -                                    |                        | [3]        |
| Ethanol (0-75% (v/v) in water) extracts | 0.45-1.13 µg/mL (EC50) | -                | HCV replication suppression          |                        | [4]        |
| ECG, EGCG                               | ~68 µM (EC50)          | -                | HCV replication suppression          |                        | [4]        |
| 7-hydroxy-6-methoxy-flavanone           | 96.1 µM (IC50)         | -                | Sortase A (SrtA) activity inhibition |                        | [5]        |
| Formononetin                            | 74.9 µM (IC50)         | -                | Sortase A (SrtA) activity inhibition |                        | [5]        |

|                                       |                                  |                                               |                                                               |                      |         |
|---------------------------------------|----------------------------------|-----------------------------------------------|---------------------------------------------------------------|----------------------|---------|
| Ethanol (80% (v/v) in water) extracts | 0.195-1.56 mg/mL (MIC)           | Oxacillin (32 µg/mL) and ampicillin (4 µg/mL) | -                                                             |                      | [6]     |
| Ethanol (95% (v/v) in water) extracts | 83.9 µg/mL (IC50)                | -                                             | Inhibitory effects on tyrosinase                              |                      | [7]     |
|                                       | 98.14 µM ascorbate equivalent /g | Ascorbic acid                                 | DPPH scavenging activity                                      |                      | [8]     |
| Methanol extracts                     | 3.3 µg/mL (IC50)                 | Ascorbic acid and trolox                      | Hydrogen peroxide inhibition                                  |                      | [9]     |
| Formononetin                          | 10 µM                            | -                                             | Inhibition of early-phase apoptosis                           |                      | [10]    |
| Aqueous extracts                      | 1990 mM Trolox equivalent /g     | Trolox                                        | -                                                             | Antioxidant activity | [11]    |
|                                       | 184.4 µM ascorbate equivalent /g | Ascorbic acid                                 | DPPH scavenging activity                                      |                      | [8]     |
|                                       | -                                | Deferoxamine (10 mM)                          | ROS scavenging                                                |                      | [12]    |
|                                       | 6.42 µg/mL, IC50                 | Ascorbic acid, acarbose                       | ROS scavenging; Down regulation of PI3K/AKT and AMPK Pathways |                      | [13,14] |
|                                       | 30-100 µg/mL                     | EGCG                                          | The inhibition of elastase enzyme activity                    |                      | [15]    |

|                                                                               |                                                                                   |                                  |                                                                                                                                |         |
|-------------------------------------------------------------------------------|-----------------------------------------------------------------------------------|----------------------------------|--------------------------------------------------------------------------------------------------------------------------------|---------|
|                                                                               | 25-100<br>μg/mL                                                                   | Ascorbic<br>acid                 | ROS<br>scavengin<br>g                                                                                                          | [16]    |
|                                                                               | 2.81<br>μg/mL,<br>IC50                                                            | Ascorbic<br>acid,<br>acarbose    | ROS<br>scavengin<br>g; Down<br>regulation<br>of<br>PI3K/AKT<br>and<br>AMPK<br>Pathways                                         | [14,17] |
| Ethanol extracts                                                              | 6-<br>40 μg/ml                                                                    | Amifosti<br>ne<br>(45 mg/k<br>g) | Decreased<br>levels of<br>ROS and<br>MDA:<br>Increased<br>levels of<br>SOD,<br>GPX, and<br>G-CSFR                              | [18]    |
|                                                                               | 30-100<br>μg/mL                                                                   | EGCG                             | Decreased<br>signaling<br>of MMPs,<br>TIMP-1,<br>COL1A1,<br>elastin,<br>and<br>HAS2;<br>MAPK/A<br>P-1; NF-<br>κB and c-<br>Jun | [15]    |
| Ethanol (70%<br>(v/v) in water)<br>extracts                                   | 10-100<br>μg/mL                                                                   | -                                | Increase<br>Nrf2/ARE<br>the stress-<br>response<br>system                                                                      | [19]    |
| Combined<br>actions of<br>epicatechin,<br>syringic acid, and<br>vanillic acid | 2:1:1 (ratio<br>of syringic<br>acid,<br>vanillic<br>acid, and<br>epicatechi<br>n) | -                                | The<br>synergisti<br>c<br>inhibition<br>effect on<br>elastase<br>activity                                                      | [15]    |
| Catechin                                                                      | 10 μM                                                                             | -                                | -                                                                                                                              | [20]    |

|                                                                                          |                                |                                           |                                                                                        |                              |        |
|------------------------------------------------------------------------------------------|--------------------------------|-------------------------------------------|----------------------------------------------------------------------------------------|------------------------------|--------|
| Daidzein, formononetin, and procyanidin B2                                               | -                              | -                                         | -                                                                                      | Stimulation of hematopoiesis | [20]   |
| Sub-fractions of ethanol extracts                                                        | 31-631 $\mu\text{g/mL}$ (IC50) | P. kadsura                                | Inhibition of cyclooxygenase-1/2, phospholipase A2, 5-lipoxygenase and 12-lipoxygenase | Anti-inflammatory activity   | [21]   |
| Aqueous extracts                                                                         | 60 $\mu\text{g/mL}$ (IC50)     | -                                         | Inhibition of NO and TNF- $\alpha$ production                                          |                              | [8,22] |
| Total phenolics                                                                          | 1.33 $\mu\text{g/mL}$ (IC50)   | Sivelestact                               | -                                                                                      |                              | [23]   |
| Catechin, gallic acid, liquiritigenin, butin, 3',4',7-trihydroxyflavone, and plathymenin | -                              | -                                         | 5-Lipoxygenase inhibition                                                              |                              | [24]   |
| 2,6-dimethoxy-1,4-benzoquinone, isoliquiritigenin                                        | 5.69-6.78 $\mu\text{M}$        | l-N6-(1-iminoethyl)-lysine), indomethacin | Inhibition of NO; Pro-inflammatory cytokine inhibition                                 |                              | [25]   |
| Spasubero C, formononetin sodium, liquiritigenin, genistein, formononetin                | 16.34-28.33 $\mu\text{M}$      | l-N6-(1-iminoethyl)-lysine), indomethacin | Inhibition of NO; Pro-inflammatory cytokine inhibition                                 |                              | [25]   |

|                                                                                                                                                                                                                  |                     |                                          |                                                        |      |
|------------------------------------------------------------------------------------------------------------------------------------------------------------------------------------------------------------------|---------------------|------------------------------------------|--------------------------------------------------------|------|
| Spasuberol A and B, daidzein, genistin, 4,7,2-trihydroxy-4-methoxy-isoflavanol, and homovanillyl-4-oxo-nanoate                                                                                                   | 36.43-46.26 $\mu$ M | l-N6-(1-iminoethyl)-lysine), indometacin | Inhibition of NO; Pro-inflammatory cytokine inhibition | [25] |
| Spasuberoside A, spasuberoside B                                                                                                                                                                                 | > 100 $\mu$ M       | l-N6-(1-iminoethyl)-lysine), indometacin | Inhibition of NO; Pro-inflammatory cytokine inhibition | [25] |
| 8-O-methylretusin, biochanin A, formononetin, genistin, homovanillyl-4-oxo-nanoate, odoratin, and Spasuberol A                                                                                                   | 21.1-51.1 $\mu$ M   | l-N6-(1-iminoethyl)-lysine), indometacin | Inhibition of NO                                       | [26] |
| (+)-epipinoresinol, (+)-pinoresinol, 3-methoxydaidzein, 4-hydroxy-3-methoxy cinnamic acid, methyl ester, biochanin A, butesuperin A, calycosin, daidzin, isolariciresinol, maackiain, ononin, and Salicylic acid | 57.8-197.4 $\mu$ M  | l-N6-(1-iminoethyl)-lysine), indometacin | Inhibition of NO                                       | [26] |
| 4,8-dimethoxy-7-O- $\beta$ -D-glucopyranosyl isoflavone, 6,9-dihydroxy megastigma-4,7-                                                                                                                           | > 200 $\mu$ M       | l-N6-(1-iminoethyl)-lysine), indometacin | Inhibition of NO                                       | [26] |

|                                                                                                                |                        |                                 |                                                                                                                         |                                                              |      |
|----------------------------------------------------------------------------------------------------------------|------------------------|---------------------------------|-------------------------------------------------------------------------------------------------------------------------|--------------------------------------------------------------|------|
| dien-3-one, 8,9-dihydroxy megastigma-4,6-dien-3-one, nicotinic acid, phydroxybenzoic acid, and protocatechuate |                        |                                 |                                                                                                                         |                                                              |      |
| Procyanidin B4                                                                                                 | 22.5 nM (IC50)         | Etoposide (IC50 = 78.4 $\mu$ M) | -                                                                                                                       | Topoisomerase-II-inhibitory activity                         | [27] |
| (+)-catechin-(4→8)-(+)-catechin-(4→8)-(-)-epicatechin                                                          | 21.9 nM (IC50)         | Etoposide (IC50 = 78.4 $\mu$ M) | -                                                                                                                       |                                                              | [27] |
| Methanol extract                                                                                               | 100-500 $\mu$ g/mL     | Ketoconazole (10 $\mu$ M)       | Cyt P450 inhibition                                                                                                     | Cyt P450 3A4 enzyme inhibition <i>activity</i>               | [28] |
| Aqueous extract                                                                                                | 100-1000 $\mu$ g/mL    | Ketoconazole (10 $\mu$ M)       | Cyt P450 inhibition                                                                                                     |                                                              | [28] |
| Aqueous extracts                                                                                               | 10-100 $\mu$ g/mL      | -                               | Suppression of c-Fos, NFATc1; The block of receptor activator of NF- $\kappa$ B ligand-induced early signaling pathways | Inhibition of osteoclast differentiation and bone resorption | [29] |
| Ethanol (70% (v/v) in water) extracts                                                                          | 12.5-200 $\mu$ g/mL    | Baicalein (10-20 $\mu$ M)       | -                                                                                                                       |                                                              | [30] |
| Aqueous and ethanolic extracts                                                                                 | 3, 10, 30 $\mu$ g/mL   | Acarbose (125-500 $\mu$ g/mL)   | Inhibition of $\alpha$ -glucosidase activity                                                                            | Anti-diabetic activity                                       | [14] |
|                                                                                                                | 10, 50, 100 $\mu$ g/mL | Glucose and fructose (25 mM)    | Inhibition of AGEs formation                                                                                            |                                                              | [19] |

*Abbreviation:* AGEs- advanced glycation end products; AKT- *protein kinase B*; AMPK- AMP-activated protein kinase; AP-1- activator protein 1; ARE- antioxidant responsive element; b.w. body weight; BPA- production of erythroid burst-promoting activity; c-Jun-transcription factor Jun; COL1A1- type I collagen; Cyt P450- cytochrome P450; DPPH- 2,2-diphenyl-1-picrylhydrazyl; EC50- Half maximal effective concentration; EGC- epigallocatechin; EGCG-epigallocatechin gallate; G-CSFR- granulocyte colony-stimulating factor receptor; GM-CSA- granulocyte-monocyte colony-stimulating activity; GM-CSF- granulocyte-macrophage colony-stimulating factor; GPX- glutathione peroxidase; HAMP- hepcidin Antimicrobial Peptide; HAS2- hyaluronan synthase 2; HCV- hepatitis C virus; HIV 1 PR- human immune deficiency virus-1 protease; i.p. intraperitoneal; IL-6 –interleukin 6; MAPK- *mitogen-activated protein kinase*; MDA- malondialdehyde; MIC- minimum inhibitory concentration; MK-CSA- megakaryocyte colony-stimulating activity; MMPs- matrix metalloproteinases; NFATc1- nuclear factor of activated T-cells; NF- $\kappa$ B - nuclear factor kappa B; NO- nitric oxide; Nrf2- nuclear factor erythroid 2-related factor 2; p.o. per oral; PI3K- phosphoinositide 3-kinases; ROS- reactive oxygen species; SOD- superoxide dismutase; TIMP-1- tissue inhibitor matrix metalloproteinase 1; TNF- $\alpha$ - tumor necrosis factor-alpha

**Table S2.** *In vivo* pharmacological properties of *Spatholobi Caulis* Dunn

| Active constituent<br>s of SSD                 | Model                                       | Doses<br>and route<br>of administr<br>ation | Positive<br>control                | Mechanism of<br>action                                                                                                      | Activity                                | Referen<br>ces |
|------------------------------------------------|---------------------------------------------|---------------------------------------------|------------------------------------|-----------------------------------------------------------------------------------------------------------------------------|-----------------------------------------|----------------|
| Aqueous<br>extracts                            | BALB/c<br>mice                              | 50, 100<br>mg/kg<br>b.w., p.o.              | -                                  | -                                                                                                                           | Antimicrob<br>ial activity              | [3]            |
| Aqueous<br>extracts                            | Wistar<br>albino<br>rats                    | 100, 200<br>mg/kg,<br>p.o.                  | -                                  | Decrease NO,<br>MDA, TNF- $\alpha$ ,<br>caspase-3, and<br>NF- $\kappa$ B; Increase<br>GPX, SOD, and<br>IL-10<br>expressions | Antioxidan<br>t activity                | [31]           |
|                                                | C57BL/<br>6J mice                           | 200<br>mg/kg<br>b.w. p.o.                   | Ascorbi<br>c acid,<br>acarbos<br>e | ROS<br>scavenging;<br>Down<br>regulation of<br>PI3K/AKT and<br>AMPK<br>Pathways                                             |                                         | [13,14]        |
|                                                | C57BL/<br>6J mice                           | 200<br>mg/kg<br>b.w. p.o.                   | Ascorbi<br>c acid,<br>acarbos<br>e | ROS<br>scavenging;<br>Down<br>regulation of<br>PI3K/AKT and<br>AMPK<br>Pathways                                             |                                         | [14,17]        |
| Ethanol<br>extracts                            | Kun<br>Ming<br>mice                         | 40 g/kg<br>b.w, p.o.                        | Amifost<br>ine<br>(45 mg/<br>kg)   | Decreased<br>levels of ROS<br>and MDA:<br>Increased levels<br>of SOD, GPX,<br>and G-CSFR                                    | Stimulatio<br>n of<br>hematopoi<br>esis | [18]           |
| Ethanol<br>(70% (v/v)<br>in water)<br>extracts | db/db,<br>C57BL/<br>KsJ and<br>db/m<br>mice | 200<br>mg/kg<br>b.w., p.o.                  | -                                  | Increase<br>Nrf2/ARE the<br>stress-response<br>system                                                                       |                                         | [19]           |
| Catechin                                       | Kun<br>Ming<br>mice                         | 1 mg/day,<br>i.p.                           | -                                  | GM-CSF; IL-6                                                                                                                |                                         | [32]           |
|                                                | NIH<br>strain<br>mice                       | 0.01, 0.05<br>g/kg b.w,<br>i.p.             | -                                  | GM-CSA, BPA<br>and MK-CSA                                                                                                   |                                         | [33]           |



|                                       |                     |                              |                                                          |                                                                                                                                                                                              |                            |      |
|---------------------------------------|---------------------|------------------------------|----------------------------------------------------------|----------------------------------------------------------------------------------------------------------------------------------------------------------------------------------------------|----------------------------|------|
| Decoction of SSD                      | Kun Ming mice       | -                            | -                                                        | -                                                                                                                                                                                            |                            | [34] |
| Aqueous extracts                      | C57BL/6 female mice | 108 g dried CS/kg b.w., i.p. | -                                                        | HAMP expression inhibition; Decrease in hepatic iron concentration; Increase in serum iron concentration                                                                                     |                            | [35] |
| Aqueous extracts                      | Wistar albino rats  | 100, 200 mg/kg b.w., p.o.    | Heparin                                                  | Decreased IL-1 $\beta$ and amylase and lipase                                                                                                                                                |                            | [36] |
| Liquiritigenin                        | BALB/c mice         | 1 mg/mL                      | -                                                        | Blocked T Cell Activation; Downregulation of PI3K/Akt pathways                                                                                                                               | Anti-inflammatory activity | [37] |
| Ethanol (95% (v/v) in water) extracts | ICR mice            | 100 and 200 mg/kg b.w., p.o. | Aspirin (1 mM), nitroprusside 30 ( $\mu$ g/ml)           | Prevention of fibrinogen binding to GP IIb/IIIa receptor                                                                                                                                     | Antiplatelet effects       | [38] |
| Aqueous extracts                      | SD rats             | 10 mg/kg b.w., p.o.          | Ketoconazole (0.25 and 1 $\mu$ M)                        | Cyt P450 inhibition                                                                                                                                                                          | Hepatoprotective activity  | [39] |
| Aqueous and ethanolic extracts        | C57BL/6J mice       | 100 and 200 mg/kg b.w., p.o. | STZ-induced diabetic plus acarbose (200 mg/kg bw., p.o.) | Reduced blood glucose, oral glucose tolerance test, Phosphoenolpyruvate carboxykinase, and glucose-6-phosphatase, enhances glucose uptake and GLUT4 activation via PI3K/AKT and AMPK pathway | Anti-diabetic activity     | [14] |

|                                                       |                       |                                          |                                                                                                                                                                    |      |
|-------------------------------------------------------|-----------------------|------------------------------------------|--------------------------------------------------------------------------------------------------------------------------------------------------------------------|------|
| C57BL/<br>KsJ<br>db/db<br>mice<br>and<br>db/m<br>mice | 50 mg/kg<br>b.w., p.o | Metfor<br>min<br>(200<br>mg/kg,<br>p.o.) | Reduced body<br>weight, blood<br>glucose,<br>HbA1c,<br>triglyceride,<br>total<br>cholesterol,<br>low-density<br>lipoprotein<br>cholesterol, and<br>free fatty acid | [19] |
|-------------------------------------------------------|-----------------------|------------------------------------------|--------------------------------------------------------------------------------------------------------------------------------------------------------------------|------|

*Abbreviation:* AKT- protein kinase B; AMPK- AMP-activated protein kinase; AP-1- activator protein 1; ARE- antioxidant responsive element; b.w. body weight; BPA- production of erythroid burst-promoting activity; c-Jun-transcription factor Jun; COL1A1- type I collagen; Cyt P450- cytochrome P450; DPPH- 2,2-diphenyl-1-picrylhydrazyl; EC50- Half maximal effective concentration; EGC- epigallocatechin; EGCG-epigallocatechin gallate; G-CSFR- granulocyte colony-stimulating factor receptor; GM-CSA- granulocyte-monocyte colony-stimulating activity; GM-CSF- granulocyte-macrophage colony-stimulating factor; GPX- glutathione peroxidase; HAMP- hepcidin Antimicrobial Peptide; HAS2- hyaluronan synthase 2; HCV- hepatitis C virus; HIV 1 PR- human immune deficiency virus-1 protease; i.p. intraperitoneal; IL-6 –interleukin 6; MAPK- mitogen-activated protein kinase; MDA- malondialdehyde; MIC- minimum inhibitory concentration; MK-CSA- megakaryocyte colony-stimulating activity; MMPs- matrix metalloproteinases; NFATc1- nuclear factor of activated T-cells; NF- $\kappa$ B - nuclear factor kappa B; NO- nitric oxide; Nrf2- nuclear factor erythroid 2-related factor 2; p.o. per oral; PI3K- phosphoinositide 3-kinases; ROS- reactive oxygen species; SOD- superoxide dismutase; TIMP-1- tissue inhibitor matrix metalloproteinase 1; TNF- $\alpha$ - tumor necrosis factor-alpha

## References

1. Lam, T.L.; Lam, M.L.; Au, T.K.; Ip, D.T.; Ng, T.B.; Fong, W.P.; Wan, D.C. A comparison of human immunodeficiency virus type-1 protease inhibition activities by the aqueous and methanol extracts of Chinese medicinal herbs. *Life Sci.* **2000**, *67*, 2889-2896, doi:10.1016/s0024-3205(00)00864-x.
2. Guo, J.P.; Pang, J.; Wang, X.W.; Shen, Z.Q.; Jin, M.; Li, J.W. In vitro screening of traditionally used medicinal plants in China against enteroviruses. *World J. Gastroenterol.* **2006**, *12*, 4078-4081, doi:10.3748/wjg.v12.i25.4078.
3. Pang, J.; Guo, J.P.; Jin, M.; Chen, Z.Q.; Wang, X.W.; Li, J.W. Antiviral effects of aqueous extract from *Spatholobus suberectus* Dunn. against coxsackievirus B3 in mice. *Chin J Integr Med* **2011**, *17*, 764-769, doi:10.1007/s11655-011-0642-1.
4. Chen, S.R.; Wang, A.Q.; Lin, L.G.; Qiu, H.C.; Wang, Y.T.; Wang, Y. In Vitro Study on Anti-Hepatitis C Virus Activity of *Spatholobus suberectus* Dunn. *Molecules* **2016**, *21*, doi:10.3390/molecules21101367.
5. Park, W.; Ahn, C.H.; Cho, H.; Kim, C.K.; Shin, J.; Oh, K.B. Inhibitory Effects of Flavonoids from *Spatholobus suberectus* on Sortase A and Sortase A-Mediated Aggregation of *Streptococcus mutans*. *Journal of Microbiolog and Biotechnology* **2017**, *27*, 1457-1460, doi:10.4014/jmb.1704.04001.
6. Kim, G.; Gan, R.Y.; Zhang, D.; Farha, A.K.; Habimana, O.; Mavumengwana, V.; Li, H.B.; Wang, X.H.; Corke, H. Large-Scale Screening of 239 Traditional Chinese Medicinal Plant Extracts for Their Antibacterial Activities against Multidrug-Resistant *Staphylococcus aureus* and Cytotoxic Activities. *Pathogens* **2020**, *9*, doi:10.3390/pathogens9030185.
7. Wang, K.H.; Lin, R.D.; Hsu, F.L.; Huang, Y.H.; Chang, H.C.; Huang, C.Y.; Lee, M.H. Cosmetic applications of selected traditional Chinese herbal medicines. *J. Ethnopharmacol.* **2006**, *106*, 353-359, doi:10.1016/j.jep.2006.01.010.
8. Ravipati, A.S.; Zhang, L.; Koyyalamudi, S.R.; Jeong, S.C.; Reddy, N.; Bartlett, J.; Smith, P.T.; Shanmugam, K.; Munch, G.; Wu, M.J.; et al. Antioxidant and anti-inflammatory activities of selected Chinese medicinal plants and their relation with antioxidant content. *BMC Complement. Altern. Med.* **2012**, *12*, 173, doi:10.1186/1472-6882-12-173.
9. Chang, C.L.; Lin, C.S.; Lai, G.H. Phytochemical characteristics, free radical scavenging activities, and neuroprotection of five medicinal plant extracts. *Evid. Based Complement. Alternat. Med.* **2012**, *2012*, 984295, doi:10.1155/2012/984295.
10. Tian, Z.; Liu, S.B.; Wang, Y.C.; Li, X.Q.; Zheng, L.H.; Zhao, M.G. Neuroprotective effects of formononetin against NMDA-induced apoptosis in cortical neurons. *Phytother. Res.* **2013**, *27*, 1770-1775, doi:10.1002/ptr.4928.
11. Liao, H.; Banbury, L.K.; Leach, D.N. Antioxidant activity of 45 Chinese herbs and the relationship with their TCM characteristics. *Evid. Based Complement. Alternat. Med.* **2008**, *5*, 429-434, doi:10.1093/ecam/nem054.
12. Toyama, T.; Wada-Takahashi, S.; Takamichi, M.; Watanabe, K.; Yoshida, A.; Yoshino, F.; Miyamoto, C.; Maehata, Y.; Sugiyama, S.; Takahashi, S.S.; et al. Reactive oxygen species scavenging activity of Jixueteng evaluated by electron spin resonance (ESR) and photon emission. *Nat Prod Commun* **2014**, *9*, 1755-1759.
13. Fu, Y.F.; Jiang, L.H.; Zhao, W.D.; Xi-Nan, M.; Huang, S.Q.; Yang, J.; Hu, T.J.; Chen, H.L. Immunomodulatory and antioxidant effects of total flavonoids of *Spatholobus suberectus* Dunn on PCV2 infected mice. *Sci Rep* **2017**, *7*, 8676, doi:10.1038/s41598-017-09340-9.
14. Zhao, P.; Alam, M.B.; Lee, S.H.; Kim, Y.J.; Lee, S.; An, H.; Choi, H.J.; Son, H.U.; Park, C.H.; Kim, H.H.; et al. *Spatholobus suberectus* Exhibits Antidiabetic Activity In Vitro and In

- Vivo through Activation of AKT-AMPK Pathway. *Evid Based Complement Alternat Med* **2017**, 2017, 6091923, doi:10.1155/2017/6091923.
15. Kwon, K.R.; Alam, M.B.; Park, J.H.; Kim, T.H.; Lee, S.H. Attenuation of UVB-Induced Photo-Aging by Polyphenolic-Rich *Spatholobus suberectus* Stem Extract Via Modulation of MAPK/AP-1/MMPs Signaling in Human Keratinocytes. *Nutrients* **2019**, *11*, doi:10.3390/nu11061341.
  16. Tan, X.; Dong, X.Z.; Guo, D.H.; Wang, S.; Li, M.H.; Zhao, R.Q.; Liu, P. [Anti-radiation effect and mechanism studies of ethanol extracts from *Spatholobus suberectus* and its active component catechin]. *Zhongguo Zhong Yao Za Zhi* **2016**, *41*, 1718-1724, doi:10.4268/cjcm20160924.
  17. Chen, H.L.; Yang, J.; Fu, Y.F.; Meng, X.N.; Zhao, W.D.; Hu, T.J. Effect of total flavonoids of *Spatholobus suberectus* Dunn on PCV2 induced oxidative stress in RAW264.7 cells. *BMC Complement Altern Med* **2017**, *17*, 244, doi:10.1186/s12906-017-1764-6.
  18. Dong, X.Z.; Wang, Y.N.; Tan, X.; Liu, P.; Guo, D.H.; Yan, C. Protective Effect of JXT Ethanol Extract on Radiation-Induced Hematopoietic Alteration and Oxidative Stress in the Liver. *Oxid. Med. Cell. Longev.* **2018**, 2018, 9017835, doi:10.1155/2018/9017835.
  19. Do, M.H.; Hur, J.; Choi, J.; Kim, Y.; Park, H.Y.; Ha, S.K. *Spatholobus suberectus* Ameliorates Diabetes-Induced Renal Damage by Suppressing Advanced Glycation End Products in db/db Mice. *Int J Mol Sci* **2018**, *19*, doi:10.3390/ijms19092774.
  20. Chang, J.; Sun, W.; Zeng, J.; Xue, Y.; Zhang, Y.; Pan, X.; Zhou, Y.; Lai, M.; Bian, G.; Zhou, Q.; et al. Establishment of an in vitro system based on AGM-S3 co-culture for screening traditional herbal medicines that stimulate hematopoiesis. *J. Ethnopharmacol.* **2019**, *240*, 111938, doi:10.1016/j.jep.2019.111938.
  21. Li, R.W.; David Lin, G.; Myers, S.P.; Leach, D.N. Anti-inflammatory activity of Chinese medicinal vine plants. *J. Ethnopharmacol.* **2003**, *85*, 61-67, doi:10.1016/s0378-8741(02)00339-2.
  22. Cai, Y.; Wang, S.; Guo, W.; Xie, Z.; Zheng, Y.; Cao, Z.; Zhou, Y. Transcriptome analysis provides insights into the immune responsive pathways and genes in the head kidney of tiger grouper (*Epinephelus fuscoguttatus*) fed with *Spatholobus suberectus*, *Phellodendron amurense*, or *Eclipta prostrata*. *Fish Shellfish Immunol.* **2018**, *73*, 100-111, doi:10.1016/j.fsi.2017.12.004.
  23. Huang, Y.; Chen, L.; Feng, L.; Guo, F.; Li, Y. Characterization of total phenolic constituents from the stems of *Spatholobus suberectus* using LC-DAD-MS(n) and their inhibitory effect on human neutrophil elastase activity. *Molecules* **2013**, *18*, 7549-7556, doi:10.3390/molecules18077549.
  24. Jiang, S.; Huang, K.; Liu, W.; Fu, F.; Xu, J. Combined Autodock and comparative molecular field analysis study on predicting 5-lipoxygenase inhibitory activity of flavonoids isolated from *Spatholobus suberectus* Dunn. *Zeitschrift fur Naturforschung. C, Journal of biosciences* **2015**, *70*, 103-113, doi:10.1515/znc-2014-4110.
  25. Liu, X.Y.; Zhang, Y.B.; Yang, X.W.; Yang, Y.F.; Xu, W.; Zhao, W.; Peng, K.F.; Gong, Y.; Liu, N.F.; Zhang, P. Anti-Inflammatory Activity of Some Characteristic Constituents from the Vine Stems of *Spatholobus suberectus*. *Molecules* **2019**, *24*, doi:10.3390/molecules24203750.
  26. Liu, X.Y.; Zhang, Y.B.; Yang, X.W.; Xu, W.; Liu, L.; Zhang, P.; Gong, Y.; Liu, N.F.; Peng, K.F. Simultaneous determination of twenty-five compounds with anti-inflammatory activity in *Spatholobi Caulis* by using an optimized UFLC-MS/MS method: An application to pharmacokinetic study. *Journal of Pharmaceutical and Biomedical Analysis* **2021**, *204*, 114267, doi:10.1016/j.jpba.2021.114267.

27. Han, A.R.; Park, H.J.; Chen, D.; Jang, D.S.; Kim, H.J.; Lee, S.K.; Seo, E.K. Topoisomerase-II-inhibitory principles from the stems of *Spatholobus suberectus*. *Chem. Biodivers.* **2007**, *4*, 1487-1491, doi:10.1002/cbdv.200790127.
28. Ashour, M.L.; Youssef, F.S.; Gad, H.A.; Wink, M. Inhibition of Cytochrome P450 (CYP3A4) Activity by Extracts from 57 Plants Used in Traditional Chinese Medicine (TCM). *Pharmacogn. Mag.* **2017**, *13*, 300-308, doi:10.4103/0973-1296.204561.
29. Ha, H.; Shim, K.S.; An, H.; Kim, T.; Ma, J.Y. Water extract of *Spatholobus suberectus* inhibits osteoclast differentiation and bone resorption. *BMC Complement. Altern. Med.* **2013**, *13*, 112, doi:10.1186/1472-6882-13-112.
30. Im, N.K.; Lee, S.G.; Lee, D.S.; Park, P.H.; Lee, I.S.; Jeong, G.S. *Spatholobus suberectus* inhibits osteoclastogenesis and stimulates chondrogenesis. *Am. J. Chin. Med.* **2014**, *42*, 1123-1138, doi:10.1142/S0192415X14500700.
31. Zhang, R.; Liu, C.; Liu, X.; Guo, Y. Protective effect of *Spatholobus suberectus* on brain tissues in cerebral ischemia. *American Journal of Translational Research* **2016**, *8*, 3963-3969.
32. Liu, P.; Wang, D.X.; Chen, R.Y.; Chen, M.L.; Yin, J.F.; Chen, G.Y. [Effect of catechin on bone marrow cell cycle and gene expression of hematopoietic growth factors]. *Yao Xue Xue Bao* **2004**, *39*, 424-428.
33. Wang, D.X.; Liu, P.; Chen, Y.H.; Chen, R.Y.; Guo, D.H.; Ren, H.Y.; Chen, M.L. Stimulating effect of catechin, an active component of *Spatholobus suberectus* Dunn, on bioactivity of hematopoietic growth factor. *Chin. Med. J. (Engl.)* **2008**, *121*, 752-755.
34. Chen, D.H.; Luo, X.; Yu, M.Y.; Zhao, Y.Q.; Cheng, Y.F.; Yang, Z.R. [Effect of *Spatholobus suberectus* on the bone marrow cells and related cytokines of mice]. *Zhongguo Zhong Yao Za Zhi* **2004**, *29*, 352-355.
35. Guan, Y.; An, P.; Zhang, Z.; Zhang, F.; Yu, Y.; Wu, Q.; Shi, Y.; Guo, X.; Tao, Y.; Wang, F. Screening identifies the Chinese medicinal plant *Caulis Spatholobi* as an effective HAMP expression inhibitor. *J. Nutr.* **2013**, *143*, 1061-1066, doi:10.3945/jn.113.174201.
36. Shao, Z. *Spatholobus Suberectus* Stem Extract Improves the Protective Effect of Heparin on Cerulein-Induced Pancreatitis. *Afr. J. Tradit. Complement. Altern. Med.* **2017**, *14*, 187-193, doi:10.21010/ajtcam.v14i3.20.
37. Lee, H.S.; Kim, E.N.; Jeong, G.S. Oral Administration of Liquiritigenin Confers Protection from Atopic Dermatitis through the Inhibition of T Cell Activation. *Biomolecules* **2020**, *10*, doi:10.3390/biom10050786.
38. Lee, B.J.; Jo, I.Y.; Bu, Y.; Park, J.W.; Maeng, S.; Kang, H.; Jang, W.; Hwang, D.S.; Lee, W.; Min, K.; et al. Antiplatelet effects of *Spatholobus suberectus* via inhibition of the glycoprotein IIb/IIIa receptor. *J. Ethnopharmacol.* **2011**, *134*, 460-467, doi:10.1016/j.jep.2010.12.039.
39. Pao, L.H.; Hu, O.Y.; Fan, H.Y.; Lin, C.C.; Liu, L.C.; Huang, P.W. Herb-drug interaction of 50 Chinese herbal medicines on CYP3A4 activity in vitro and in vivo. *Am. J. Chin. Med.* **2012**, *40*, 57-73, doi:10.1142/S0192415X1250005X.
